# Supplementary material for: Nitronyl and imino nitroxide free radicals as precursors of magnetic phthalocyanine and porphyrin building blocks
Source: Royal Society of Chemistry journal article supplement (doi:10.1039/c4nj00574k), 2014-01-01
Supplement: c4nj00574k1.pdf [file c4nj00574k1.pdf]

## Supporting Information

### Nitronyl and Imino Nitroxide Free Radicals as Precursors of Magnetic Phthalocyanine and Porphyrin Building Blocks

Emel Önal,<sup>a,b</sup> Yusuf Yerli,<sup>c</sup> Bunyemin Cosut,<sup>a</sup> Guillaume Pilet,<sup>b</sup> Vefa Ahsen,<sup>a</sup> Dominique  
Luneau\*<sup>b</sup> and Catherine Hirel\*<sup>a</sup>

<sup>a</sup>Gebze Institute of Technology, Department of Chemistry, 41400, Kocaeli, Turkey

E-mail: [chirel@gyte.edu.tr](mailto:chirel@gyte.edu.tr); Fax ; +90 262 605 31 01 ; Tel : +90 262 605 30 21

<sup>b</sup>Université Claude Bernard Lyon 1, Laboratoire des Multimatériaux et Interfaces (UMR 5615),  
Campus de La Doua, 69622 Villeurbanne Cedex, France

E-mail : [dominique.luneau@univ-lyon1.fr](mailto:dominique.luneau@univ-lyon1.fr); Fax : +33 472 440 618 ; Tel : +33 472 431 418

<sup>c</sup>Gebze Institute of Technology, Department of Physics, 41400 Kocaeli, Turkey

a)

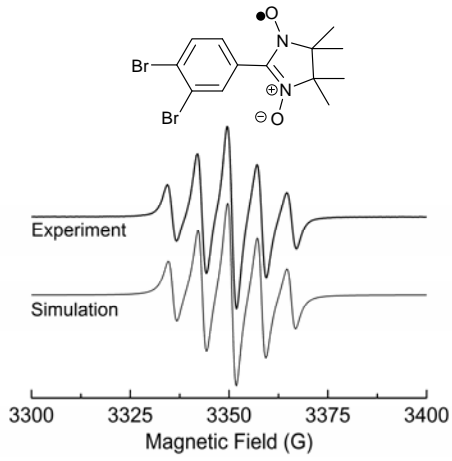

b)

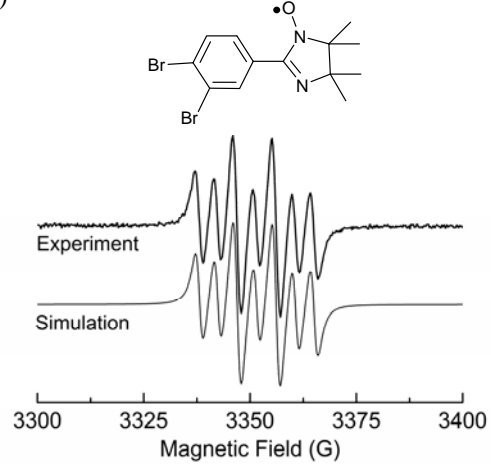

c)

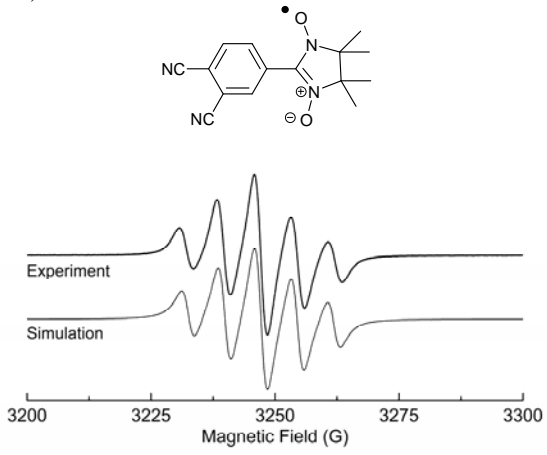

d)

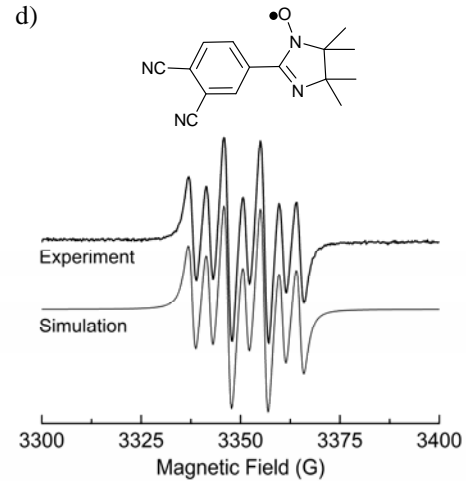

e)

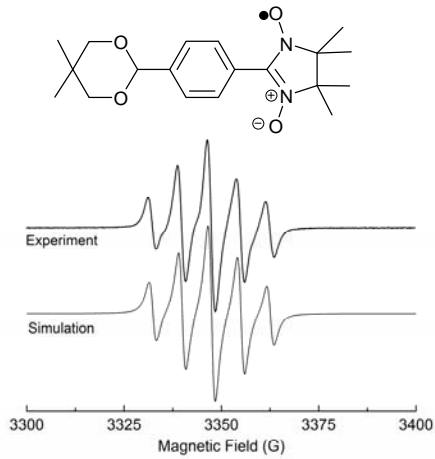

f)

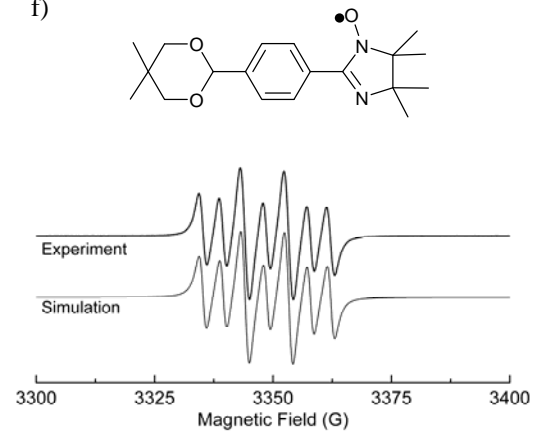

g)

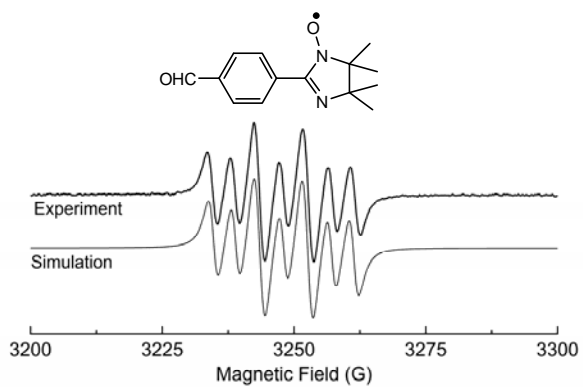

**Figure S1:** X-band ESR spectra of mono radicals (a) **2** , (b) **3** , (c) **4** , (d) **5** , (e) **7** , (f) **8** , (g) **9** in  $\text{CHCl}_3$  ( $c = 10^{-4}$  M) at room temperature.

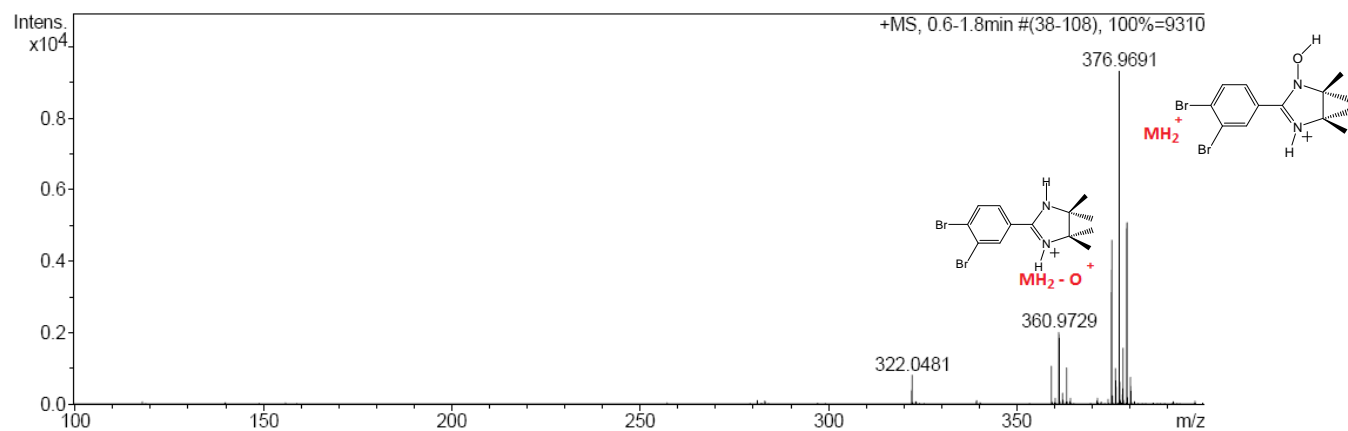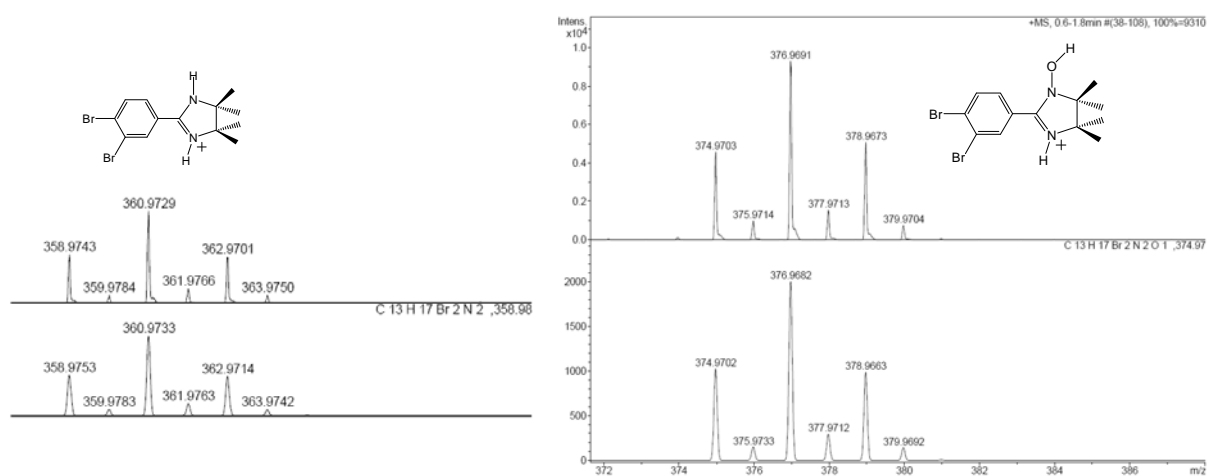

**Figure S2:** ESI mass spectrum of nitronyl nitroxide **3**.
